# Supplementary material for: CCR5 receptor antagonism inhibits hepatitis C virus (HCV) replication in vitro
Source: PubMed Central journal article supplement (PMC6818973; doi:10.1371/journal.pone.0224523), 2019-10-29

100 bp  
Ladder

HCV RNA  
(negative strand)  
in cell lysate

Raltegravir  
Cenicriviroc  
Maraviroc  
Sofosbuvir  
No drug

HCV RNA  
(negative strand)  
in supernatant

Raltegravir  
Cenicriviroc  
Maraviroc  
Sofosbuvir  
No drug

GAPDH  
housekeeping control  
in cell lysate

Raltegravir  
Cenicriviroc  
Maraviroc  
Sofosbuvir  
No drug

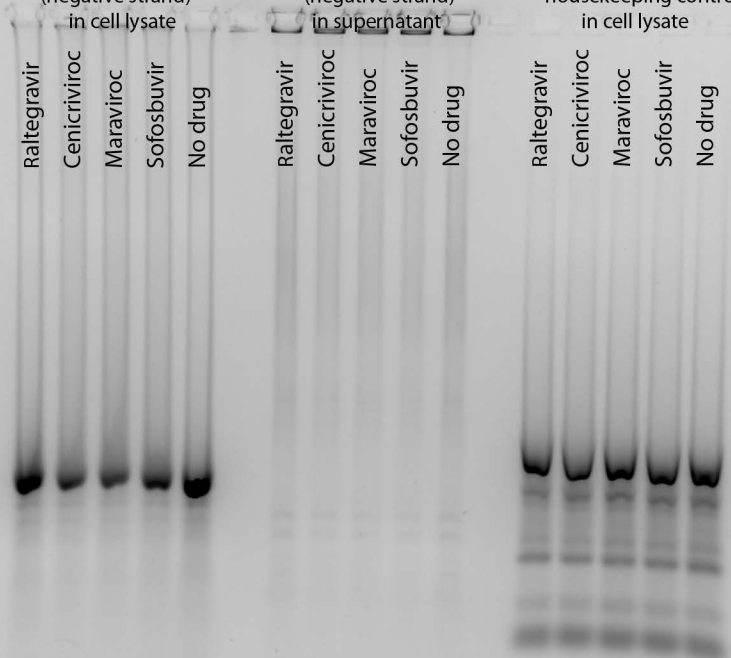

Supplement: pone.0224523.s003.pdf [file pone.0224523.s003.pdf]
